# Supplementary material for: Enhanced binding capacity of boronate affinity fibrous material for effective enrichment of nucleosides in urine samples
Source: Royal Society of Chemistry journal article supplement (doi:10.1039/c5ra27898h), 2016-01-01
Supplement: c5ra27898h1.pdf [file c5ra27898h1.pdf]

**Enhanced binding capacity of boronate affinity fibrous material for  
effective enrichment of nucleosides in urine samples**

**Supplementary data**

**Li Gao, Chaozhan Wang, Yinmao Wei\***

*Key Laboratory of Synthetic and Natural Function Molecule Chemistry of Ministry of  
Education, College of Chemistry and Materials Science, Northwest University, Xi'an  
710069, China*

\* Corresponding author: Yinmao Wei

Tel: 86-29-88302604;

Fax: 86-29-88302604;

Email: [ymwei@nwu.edu.cn](mailto:ymwei@nwu.edu.cn)

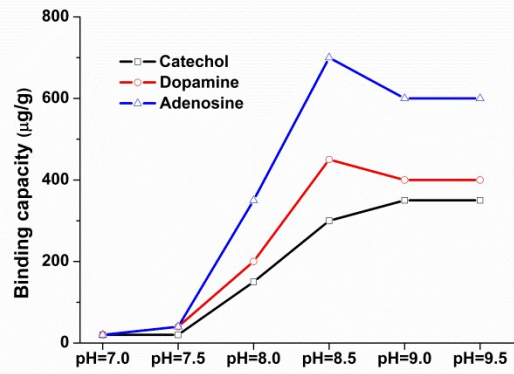

**Figure S1.** Effect of solution pH on the binding capacity of SCF@PEI@PBA towards catechol, dopamine and adenosine.

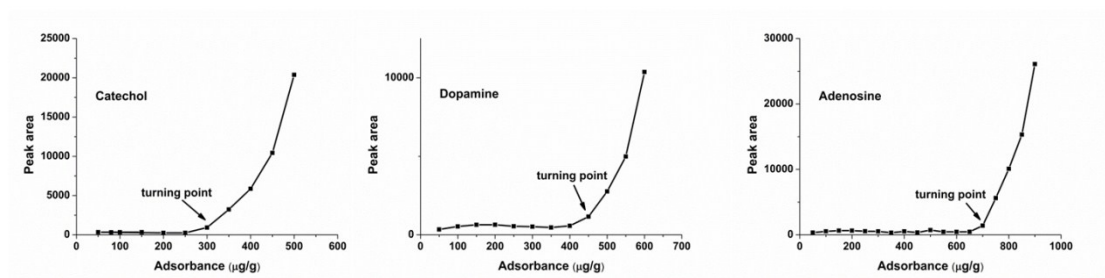

**Fig. S2.** Enrichment capacity analysis of SCF@PEI@PBA toward catechol, dopamine and adenosine.

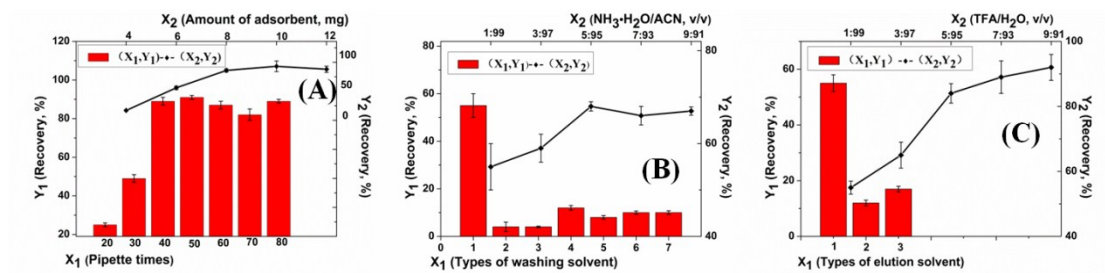

**Figure. S3.** Effects of (A) adsorbent dose and pipette times, (B) type and ratio of washing solvent and (C) type and ratio of elution solvent. Washing solvent in B: 1,  $\text{NH}_3 \cdot \text{H}_2\text{O} \cdot \text{ACN}$ ; 2,  $\text{NH}_3 \cdot \text{H}_2\text{O} \cdot \text{H}_2\text{O}$ ; 3,  $\text{NH}_3 \cdot \text{H}_2\text{O} \cdot \text{ethanol}$ ; 4,  $\text{NH}_3 \cdot \text{H}_2\text{O} \cdot \text{methanol}$ ; 5,  $\text{NH}_3 \cdot \text{H}_2\text{O} \cdot \text{acetone}$ ; 6,  $\text{NH}_3 \cdot \text{H}_2\text{O} \cdot \text{tetrahydrofuran}$ ; 7,  $\text{NH}_3 \cdot \text{H}_2\text{O} \cdot \text{DMF}$ . Elution solvent in C: 1,  $\text{TFA} \cdot \text{H}_2\text{O}$ ; 2,  $\text{formic acid} \cdot \text{H}_2\text{O}$ ; 3,  $\text{acetic acid} \cdot \text{H}_2\text{O}$ .
